# Supplementary material
Source: HighWire-hosted journal article supplement (http://www.cmaj.ca/highwire/filestream/74398/field_highwire_adjunct_files/1/190578-com-2-at.pdf)
Supplement: 190578-com-2-at.pdf [file 190578-com-2-at.pdf]

## Appendix 2: eCritical TRACER Web Reports/Dashboards

| <b>Table 1</b>                              |                                                                                                                                                              |
|---------------------------------------------|--------------------------------------------------------------------------------------------------------------------------------------------------------------|
| <b>DESCRIPTIVE</b>                          |                                                                                                                                                              |
| Critical Care Summary                       | Summary of critical care utilization, occupancy, demographic, severity of illness, avoidable patient days, and outcome statistics                            |
| Critical Care Admissions and Discharges     | Monthly percentage of patients admitted to critical care and discharged from critical care                                                                   |
| Critical Care Admission Diagnosis           | Proportion of patients grouped by admission diagnosis category over time                                                                                     |
| Critical Care Length of Stay                | Distribution (absolute number and percent of total discharges) of critical care length of stay                                                               |
| <b>UTILIZATION</b>                          |                                                                                                                                                              |
| Critical Care Bed Utilization               | Critical care bed occupancy metrics                                                                                                                          |
| Critical Care Patient Days                  | Patient days, avoidable patient days, and occupancy rates over time                                                                                          |
| Critical Care Discharge Delay               | Distribution of critical care discharge delay by hospital discharge unit                                                                                     |
| Central Line Days                           | Count of central lines running at 8am                                                                                                                        |
| <b>ACUITY</b>                               |                                                                                                                                                              |
| Clinical Frailty Score (CFS)                | Available for adult critical care and cardiovascular critical care                                                                                           |
| APACHE III score                            | For adult critical care                                                                                                                                      |
| PM3 score                                   | For pediatric critical care                                                                                                                                  |
| Pediatric Admitting Diagnosis               | Based on the ANZPIC admission diagnosis                                                                                                                      |
| <b>QUALITY</b>                              |                                                                                                                                                              |
| Critical Care Readmission                   | Absolute number, percentage of readmissions (within 72 hours of critical care discharge), average bed occupancy, and readmission rate                        |
| Critical Care Live Night Discharges         | Monthly percentage of live patients discharged from critical care between 23:00 and 07:00                                                                    |
| DVT Prophylaxis                             | Summary data of utilization of different modalities of DVT prophylaxis                                                                                       |
| PUD Prophylaxis                             | Summary data of utilization of different modalities of stress ulcer prophylaxis                                                                              |
| Donation Summary                            | Summary data for tissue and organ donation eligibility, approach and consent, medical examiner review, and autopsy consideration                             |
| Delirium                                    | Delirium screening compliance, delirium prevalence, ever delirium, and delirium eligibility                                                                  |
| <b>PROCEDURES</b>                           |                                                                                                                                                              |
| Ventilation and Intubation                  | Monthly average and median mechanical ventilation days over time and the monthly percentage of patients who remain intubated (hours or days)                 |
| Continuous Renal Replacement Therapy (CRRT) | Monthly absolute number of CRRT days, monthly percentage of critical care discharges treated with CRRT, and monthly average and median CRRT days per patient |
| Inhaled Pulmonary Vasodilators              | Usage and trend of patients on nitric oxide and inhaled epoprostenol                                                                                         |
